# Supplementary material
Source: PubMed Central journal article supplement (PMC3772390)
Supplement: supp_126.18.4195_JCS127779.pdf [file supp_126.18.4195_JCS127779.pdf]

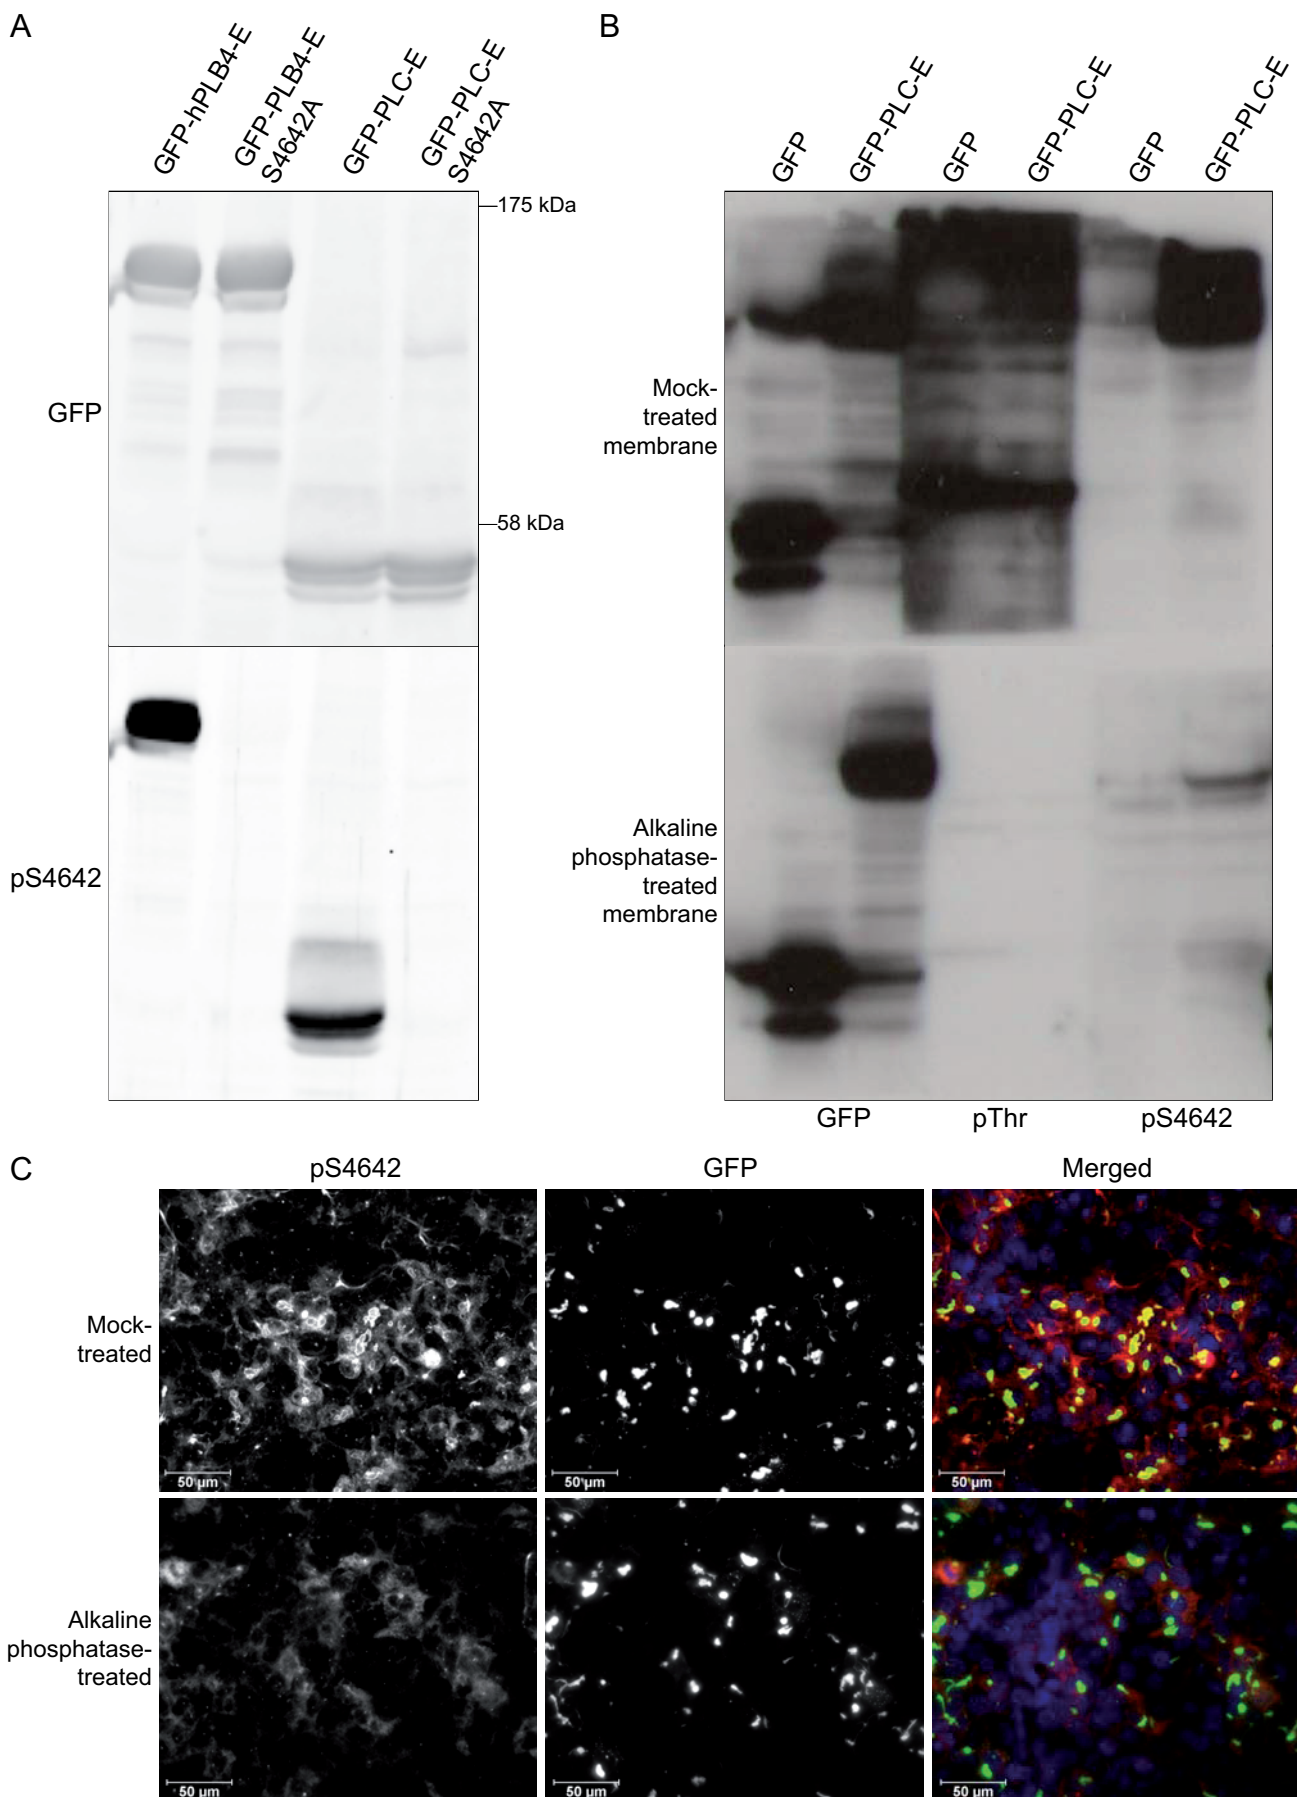

**Figure S1. Specificity of the anti-plectin pS4642 Abs.** A) WB analysis of whole extracts prepared from transiently transfected HEK 293T cells expressing various recombinant plectin proteins as indicated (8 % SDS-PAGE) with anti-GFP or -pS4642 Abs. Anti-pS4642 Abs recognized the GFP-tagged plectin proteins PL-B4-E and -PL-C-E but did not bind to the corresponding phospho-deficient S4642A mutants. WB development: upper panel: fluorescence, lower panel: ECL. B) Alkaline phosphatase treatment of WBs, prepared with whole extracts from transfected HEK 293T cells expressing GFP or GFP-PL-C-E (10 % SDS-PAGE), strongly decreased the immuno-signals (ECL) obtained with anti-phospho-threonine and anti-pS4642 Abs. C) Alkaline phosphatase treatment of transiently transfected HEK 293T cells expressing GFP-PL-B4-E (green) and fixed with methanol significantly decreased the immuno-reactivity of the anti-pS4642 Abs (red) toward the recombinant protein. The same laser intensities and exposure times were used for all pictures. Cells expressing S4642 mutants (A, G, D or E) were not recognized by the anti-pS4642 Abs (data not shown). Bar, 50 μm.

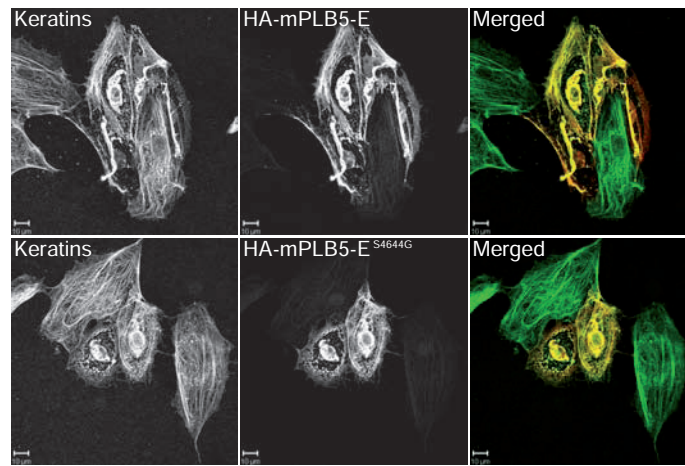

**Figure S2. HA-mPL-B5-E and HA-mPL-B5-E-S4644G colocalize with and bundle IFs in transfected PtK2 cells.** Immunofluorescence analysis of the localization of HA-tagged plectin proteins (red) with the keratins 8/18 network (green). No significant difference in localization pattern or IFs bundling was observed between the two recombinant proteins. Bar, 10  $\mu$ m.

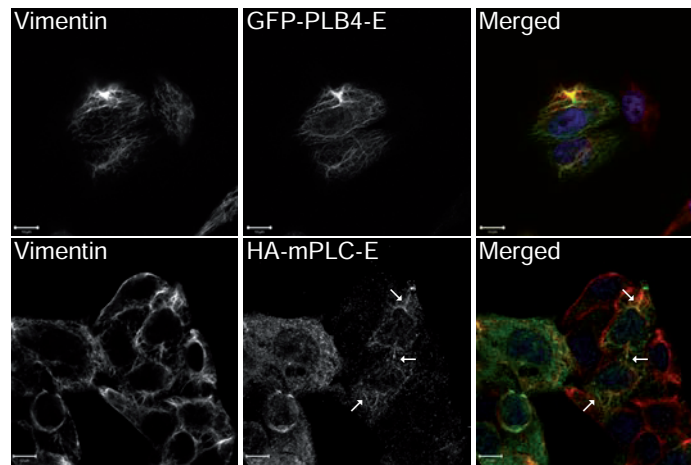

**Figure S3. GFP-PL-B4-E and HA-mPL-C-E colocalize with vimentin IFs in transfected HeLa cells.** Tagged recombinant plectin proteins (green), IFs (red), arrows: colocalized signals. Bar, 10  $\mu$ m.

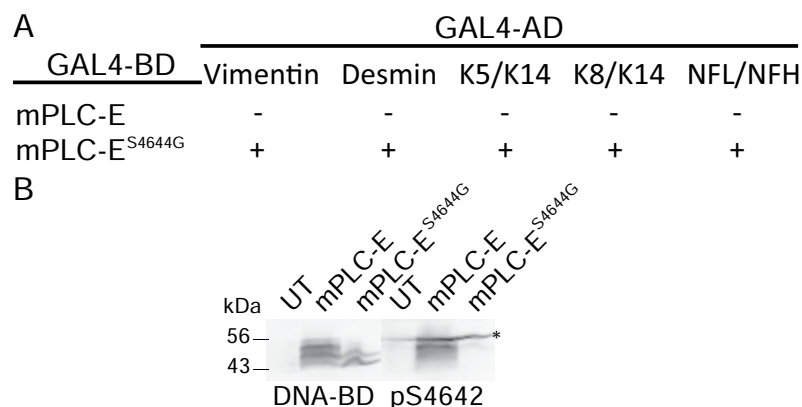

**Figure S4. Serine 4644 in mPL-C-E prevents its interaction with various IF proteins in Y3H assays.** A) +, - means growth or no growth of cotransformed PJ694 yeast strain on selection media. mPL-C-E, in contrast to mPL-C-ES4644G, did not interact with all tested IF proteins: vimentin, desmin, heterodimers of keratins 5/14, 8/18 and of NFL/NFH. B) Whole extracts from untransformed (UT) PJ694A yeasts or transformed with plasmids coding for GAL4-BD-mPL-C-E or GAL4-BD-mPL-C-ES4644G were analyzed by WB with anti-GAL4-BD and anti-pS4642/4 Abs. GAL4-BD-mPL-C-E was recognized by the anti-pS4642 Abs, indicating that it was phosphorylated (calculated size of GAL4-DNA-BD-PL-C-E: 48.6 kDa; \*: unspecific band).

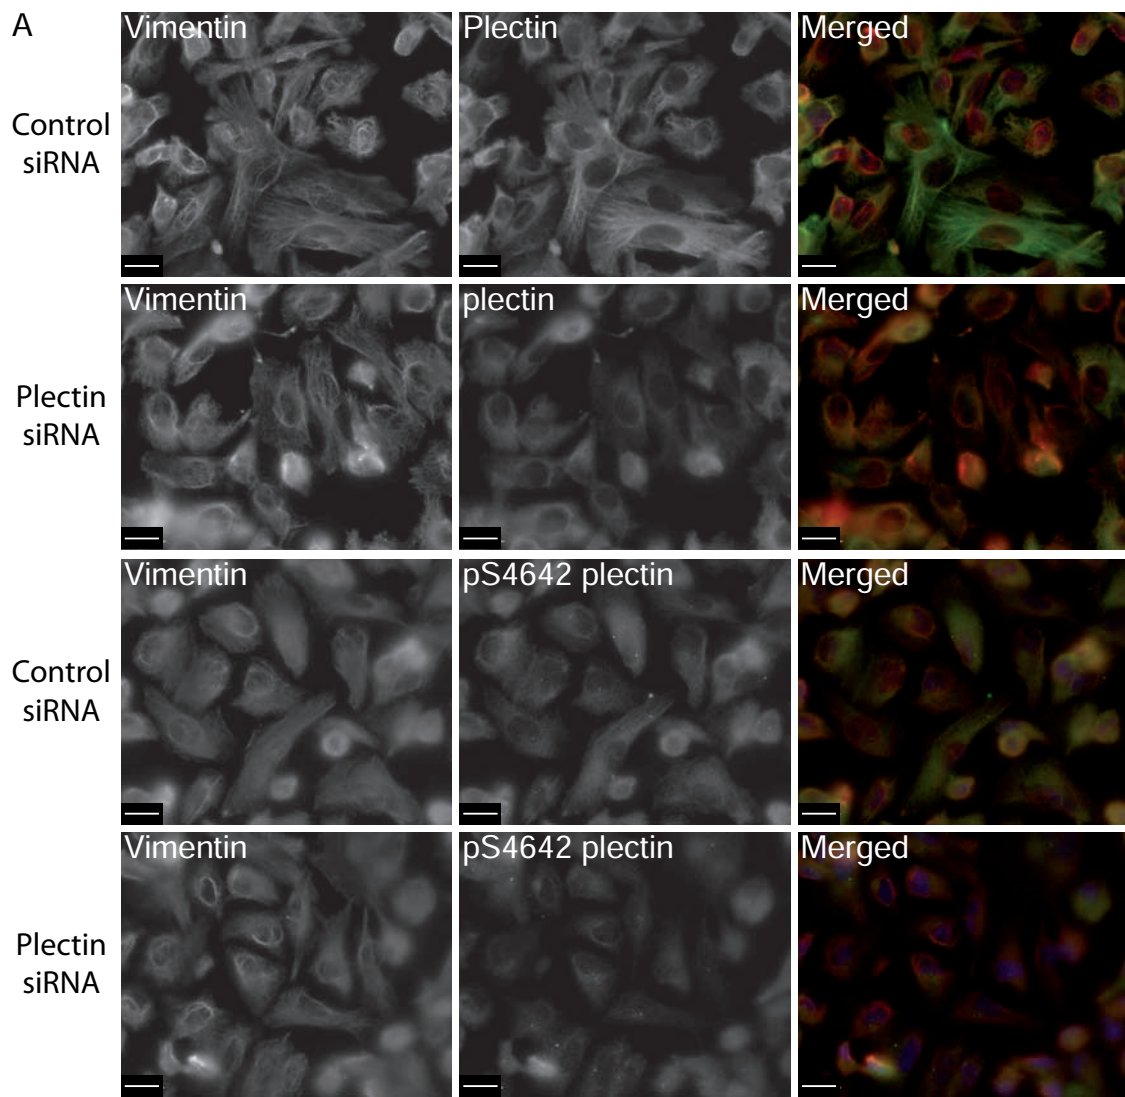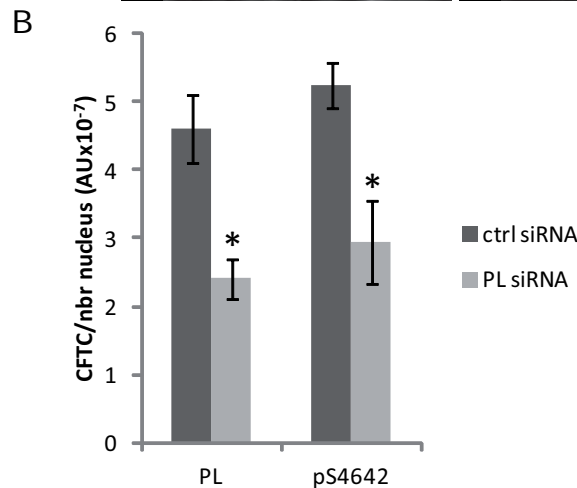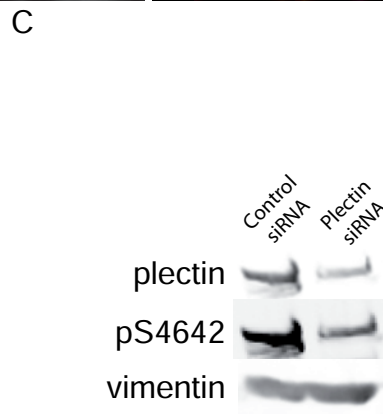

**Figure S5. Anti-pS4642 and GP21 anti-plectin Abs have a similar specificity to plectin.** A) SK-MEL-2 cells were cultured and subjected to control and plectin knock-down. Cells were fixed and immunofluorescently-labeled for vimentin, plectin and pS4642. After knock-down of plectin, signals given by both the anti-plectin and pS4642 Abs decreased. Bar, 10  $\mu\text{m}$ . B) Quantification of the fluorescent signals in A with the Image J software showed an equivalent decrease of plectin and pS4642 signals. The CFTC represents the “corrected total fluorescence” of a picture which was divided by the number of nucleus. \* $P < 0.005$  ( $n > 3$ ). C) The efficacy of plectin knock down was checked by WB. Anti-vimentin Abs were used as loading control.



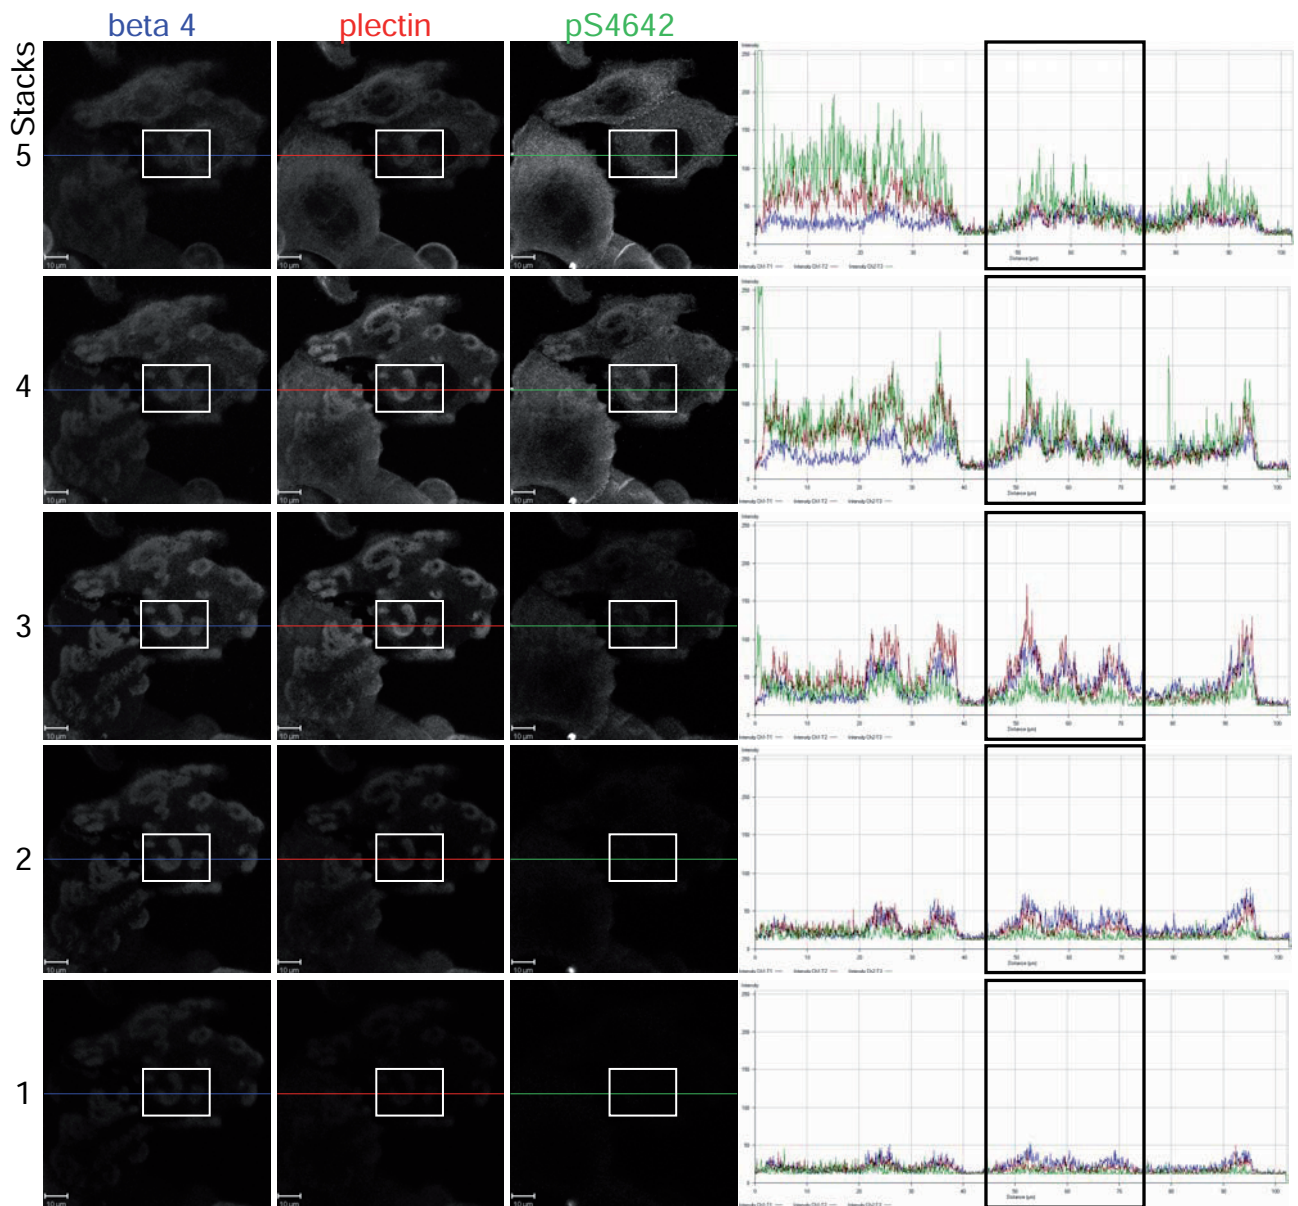

**Figure S6. In the core of PAJEB- $\beta$ 4 cell-substrate contacts plectin is weakly phosphorylated at S4642.** Cells cultured in high calcium for 24 h were fixed with formaldehyde and co-immunostained for integrin  $\beta$ 4 subunit (blue), plectin (GP21; red) and pS4642 (green) as indicated. The three immunostaining intensity profiles along the Z stacks (measured along the colored horizontal lines) were different. In hemidesmosome-like structures ( $\beta$ 4), the intensity ratio between pS4642 and plectin staining was not constant, as it strongly increased from stack 3 to 4. The white boxes in the pictures correspond to the black ones in the intensity profile graphs. Bar, 10  $\mu$ m.

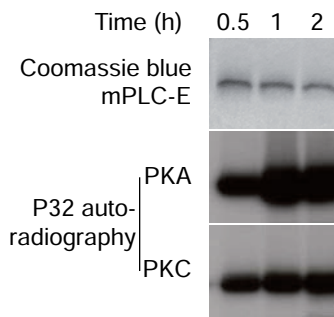

**Figure S7. PL-C-E is phosphorylated in vitro by PKA and PKC.** Purified recombinant H6-mPL-C-E was incubated with either PKA or PKC in the presence of  $\gamma$ -P32-ATP, separated on 10 % SDS-PAGE, stained with Coomassie blue and autoradiographed. Both PKs phosphorylated mPL-C-E. PKA phosphorylated a second serine residue located in the thrombin cleavage site encoded by the pET15b vector, explaining the stronger signals than with PKC.

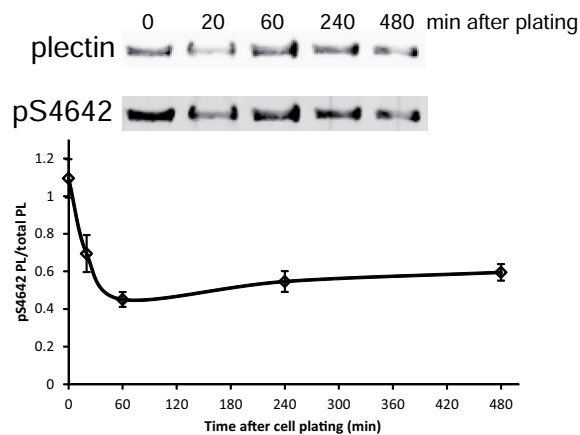

**Figure S8. Replating of trypsinized HeLa cells is accompanied by a decrease in plectin S4642 levels.** HeLa cells were detached by trypsin treatment and replated. Levels of plectin and pS4642 plectin were analyzed by WBs for different time points after replating.

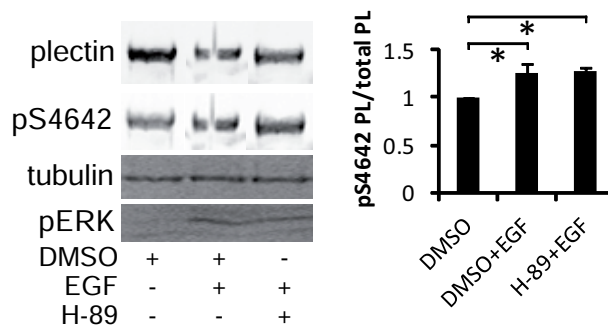

**Figure S9. H-89 PK inhibitor does not block the EGF-induced increase in plectin pS4642 levels.** Starved HeLa cells were pretreated 1 h with 10  $\mu$ M H-89 or DMSO (control) prior to stimulation with 100 ng/mL EGF for 15 min. Levels of plectin, pS4642, tubulin and pERK 1/2 were analyzed by WB. \*P<0.05 (n=3).

| Antibodies                | Targets                          | Raised in  | Dilutions  |              | Companies                | References               |
|---------------------------|----------------------------------|------------|------------|--------------|--------------------------|--------------------------|
|                           |                                  |            | Microscopy | Western blot |                          |                          |
| 10F6                      | plectin                          | mouse      |            | 1:1000       | Santa Cruz Biotechnology | sc-33649                 |
| 4.3E1                     | $\beta$ 4-integrin               | mouse      | 1:800      |              |                          | Hessle et al., 1984      |
| DP I & II                 | desmoplakin                      | mouse      | 1:200      |              | Boehringer               |                          |
| Flag (M2)                 | flag-tag                         | mouse      |            | 1:1000       | Sigma                    | F1804                    |
| GAL4 (DBD)                | DNA BD                           | mouse      |            | 1:1000       | Santa Cruz Biotechnology | sc-510                   |
| GAPDH                     | GAPDH                            | mouse      |            | 1:3000       | Santa Cruz Biotechnology | sc-47724                 |
| GFP (B-2)                 | GFP                              | mouse      |            | 1:1000       | Santa Cruz Biotechnology | sc-9996                  |
| GFP (FL)                  | GFP                              | rabbit     |            | 1:4000       | Santa Cruz Biotechnology | sc-8334                  |
| GP21                      | plectin                          | guinea pig | 1:500      | 1:10,000     | Progen                   | GP21                     |
| HA                        | HA-tag                           | rabbit     | 1:100      | 1:1000       | NeoMarkers               | RB-1438-P1               |
| HA                        | HA-tag                           | mouse      |            | 1:1000       | Thermo scientific        | sc-805                   |
| NW161                     | desmoplakin                      | rabbit     |            | 1:1000       |                          | Bornslaeger et al., 1996 |
| PanKer                    | K5, 6, 8, 17                     | mouse      | 1:200      | 1:1000       | DakoCytomation           | M 0821 (MNF116)          |
| pERK                      | p-ERK 1/2 (Thr 202)              | rabbit     |            | 1:1000       | Santa Cruz Biotechnology | sc-101760                |
| pP38                      | phospho-p38 MAPK (Thr180/Tyr182) | rabbit     |            | 1:1000       | Cell Signalling          | 9211S                    |
| pS4642                    | pS4642 plectin                   | rabbit     | 1:200      | 1:4000       |                          |                          |
| pS4642 Anti serum         | pS4642 plectin                   | rabbit     |            | 1:1000       |                          |                          |
| pThr                      | p-threonine                      | rabbit     |            | 1:1000       | Zymed                    | 71-8200                  |
| RCK 106 (ascites fluid)   | K18                              | mouse      |            | 1:10         |                          | J.H. Vost et al., 1993   |
| TBN06                     | $\beta$ -tubulin                 | mouse      |            | 1:1000       | Thermo scientific        | MA5-11732                |
| Tubulin                   | $\alpha$ -tubulin                | rabbit     |            | 1:10,000     | Epitomics                | 2871-1                   |
| V9                        | vimentin                         | mouse      | 1:200      | 1:1000       | Santa Cruz Biotechnology | sc-6260                  |
| Anti guinea pig-Alexa 568 | guinea pig IgG (H+L)             | goat       | 1:400      |              | Life technologies        | A11075                   |
| Anti guinea pig-Alexa 488 | guinea pig IgG (H+L)             | goat       |            | 1:15,000     | GE Healthcare            | A-11073                  |
| Anti mouse-Alexa 488      | mouse IgG (H+L)                  | goat       | 1:400      | 1:2000       | Life technologies        | A-11029                  |
| Anti mouse-Alexa 568      | mouse IgG (H+L)                  | goat       | 1:400      |              | Life technologies        | A11031                   |
| Anti mouse-Alexa 633      | mouse IgG (H+L)                  | goat       | 1:400      |              | Life technologies        | A21052                   |
| Anti mouse-HRP            | mouse IgG (H+L)                  | sheep      |            | 1:15,000     | GE Healthcare            | NA931                    |
| Anti mouse-IRDye 680      | mouse Ig G (H+L)                 | goat       |            | 1:30,000     | LI-COR                   | 926-32220                |
| Anti mouse-IRDye 800 CW   | mouse Ig G (H+L)                 | donkey     |            | 1:15,000     | LI-COR                   | 926-32212                |
| Anti rabbit-Alexa 488     | rabbit Ig G (H+L)                | goat       | 1:400      |              | Life technologies        | A-11008                  |
| Anti rabbit-Alexa 568     | rabbit Ig G (H+L)                | goat       | 1:400      |              | Life technologies        | A11011                   |
| Anti rabbit-HRP           | rabbit Ig G (H+L)                | goat       |            | 1:15,000     | GE Healthcare            | NA934                    |
| Anti rabbit-IRDye 800 CW  | rabbit Ig G (H+L)                | goat       |            | 1:15,000     | LI-COR                   | 926-32211                |
